# Supplementary material for: Irreversible water mediated transformation of BCN from a 3D highly porous form to its nonporous hydrolyzed counterpart
Source: Royal Society of Chemistry journal article supplement (doi:10.1039/c7ta11359e), 2018-01-01
Supplement: c7ta11359e1.pdf [file c7ta11359e1.pdf]

## Supplementary Information

### **Irreversible water mediated transformation of BCN from 3D highly porous to its nonporous hydrolyzed counterpart**

*Marc Florent and Teresa J. Bandosz\**

Department of Chemistry, The City College of New York, New York, NY 10031 USA

---

\* Whom correspondence should be addressed to. E-mail: [tbandosz@ccny.cuny.edu](mailto:tbandosz@ccny.cuny.edu); Tel.: (212) 650-6017

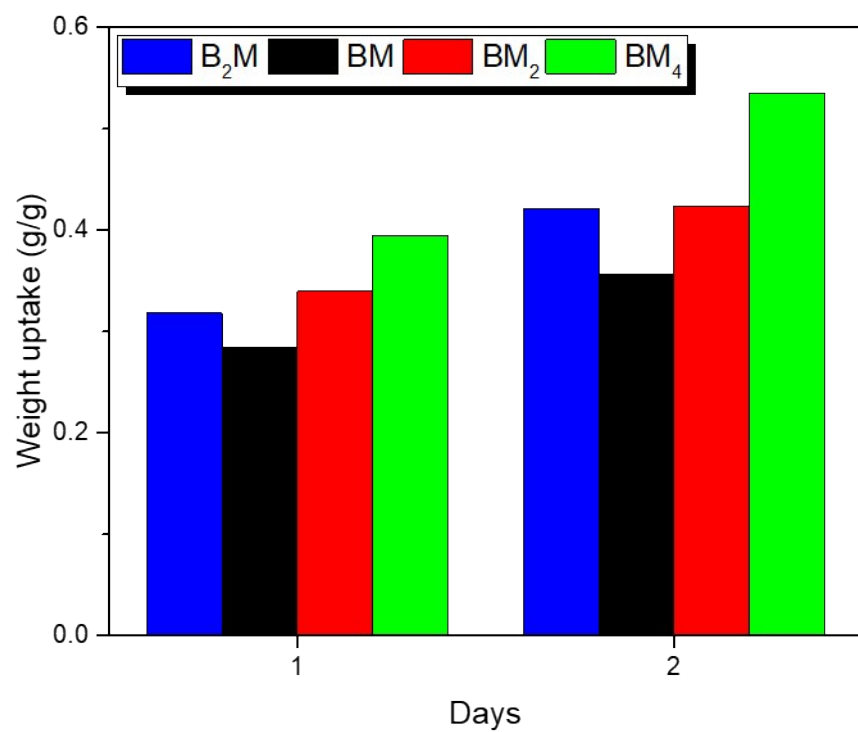

Figure S1. Water uptakes after re-exposing regenerated B<sub>2</sub>M, BM, BM<sub>2</sub> and BM<sub>4</sub> to water for 1 and 2 days

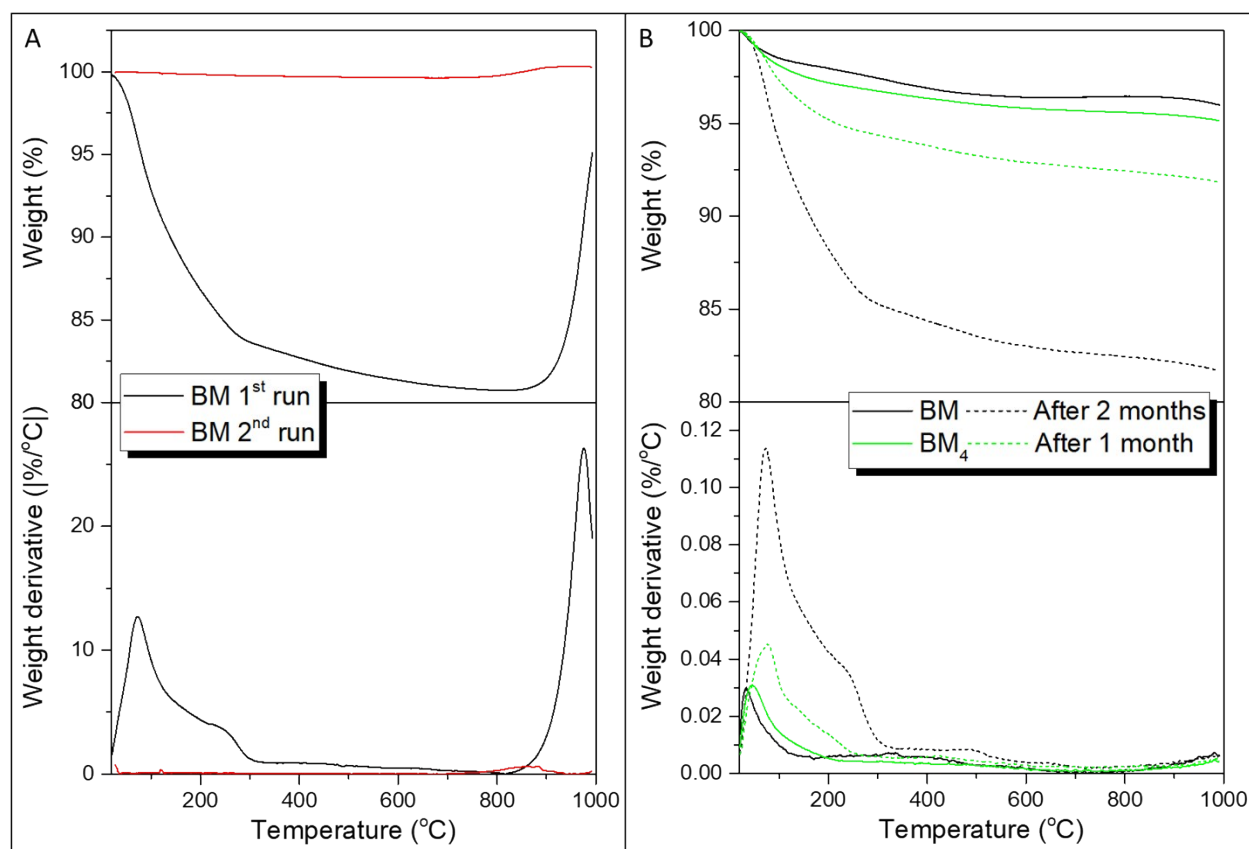

Figure S2. A) TG and DTG curves of BM measured in air twice consecutively. B) TG and DTG curves of BM and BM<sub>4</sub> measured twice in helium after few months

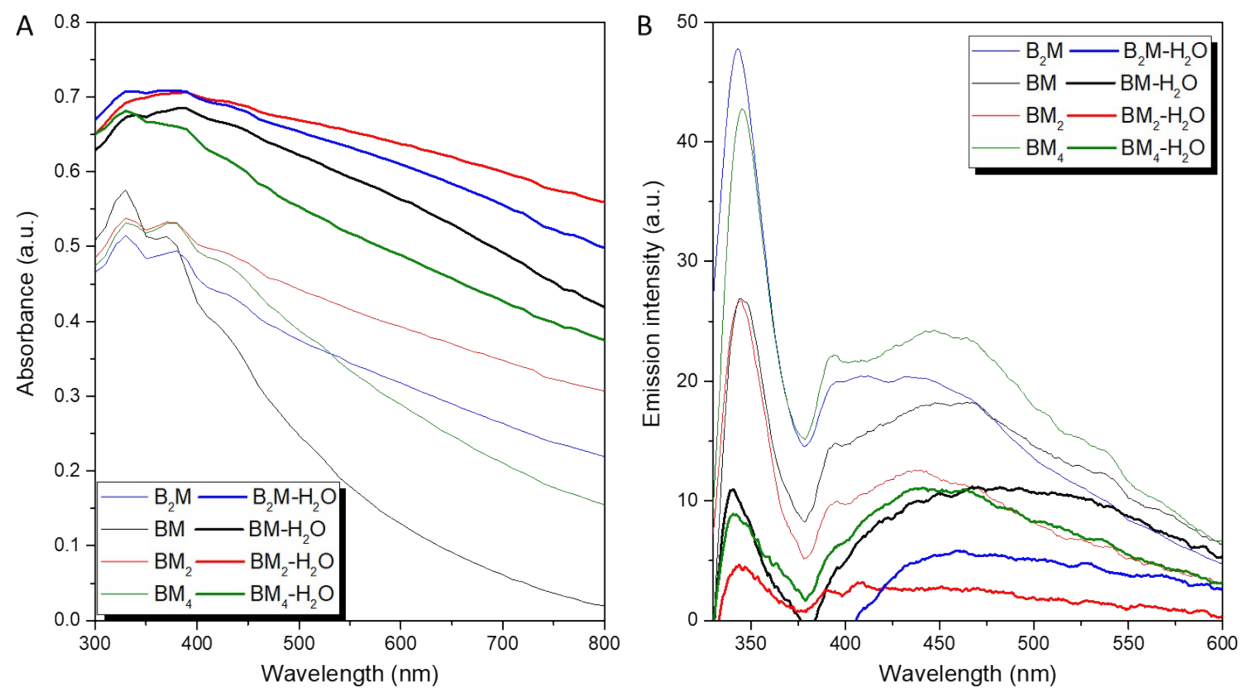

Figure S3. A) Absorbance and B) fluorescence spectra of B<sub>2</sub>M, BM, BM<sub>2</sub> and BM<sub>4</sub> before and after water exposure.  $\lambda_{\text{excitation}} = 320 \text{ nm}$ .
